# Supplementary material for: Prediction of Prognosis in Pancreatic Cancer According to Methionyl-tRNA Synthetase 1 Expression as Determined by Immunohistochemical Staining
Source: MDPI journal article supplement (doi:10.3390/cancers15225413), 2023-11-14
Supplement: s1 [file s1]

## **Supplementary Appendix**

This appendix has been provided by the authors to give readers additional information regarding their work.

Supplement to: Prediction of prognosis in pancreatic cancer according to methionyl-tRNA synthetase 1 levels determined by immunohistochemical staining

Sung Ill Jang, Ji Hae Nahm, See Young Lee, Jae Hee Cho, Min-Young Do, Joon Seong Park, Hye Sun Lee, Juyeon Yang, Jiwon Kong, Seunghwan Jung, Sunghoon Kim and Dong Ki Lee

### **Contents**

#### **1. Supplementary Results: page**

**Supplementary Figure S1: page 2**

**Supplementary Table S1: page 2**

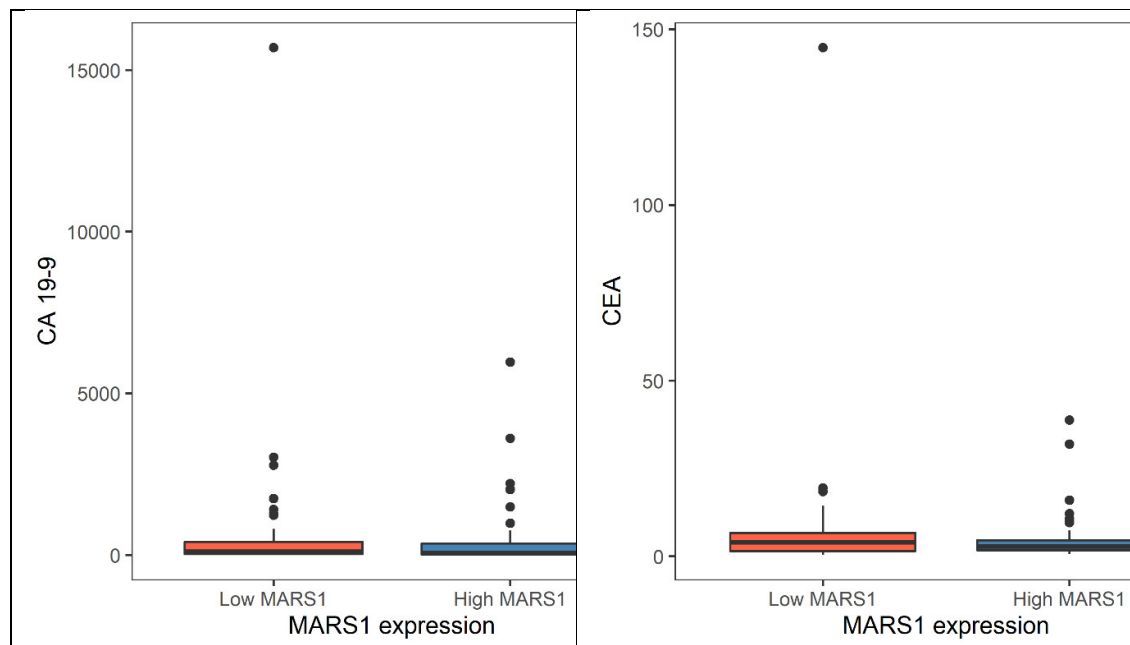

Supplementary Figure S1. CA 19-9 and CEA level analyzed using Z-score.

Supplementary Table S1 Comparison of CA 19-9 and CEA level between two group.

| Variables                          | Non-Parametric Method                |                                       |                 |
|------------------------------------|--------------------------------------|---------------------------------------|-----------------|
|                                    | Low MARS1<br>Expression Group (n=55) | High MARS1<br>Expression Group (n=82) | <i>p</i> -Value |
| CA 19-9 at adm, IU/L (median(IQR)) | 97.80 (25.30, 408.00)                | 58.80 (14.50, 373.80)                 | 0.437           |
| CEA at adm, IU/L (median(IQR))     | 3.98 (1.40, 6.80)                    | 2.79 (1.75, 4.60)                     | 0.2771          |

MARS1, methionyl-tRNA synthetase 1; se, standard error; CI, confidence intervals.
